# Supplementary material for: Incidence of neuromyelitis optica spectrum disorders in China: a large cohort study using claim data
Source: HighWire-hosted journal article supplement (doi:10.1136/bmjopen-2021-048942), 2022-01-01
Supplement: bmjopen-2021-048942supp001_data_supplement.pdf [file bmjopen-2021-048942supp001_data_supplement.pdf]

## Incidence of neuromyelitis optica spectrum disorders in China: a large cohort study using claim data

### Supplementary files

Yiqun Wu 1#, Mo Yang 2,3#, Pei Gao 1, Zijing Wang 1, Junhui Wu 1, Jiating Wang 1, Quangang Xu 2, Huanfen Zhou 2, Tao Wu 1, Weiping Wu 2, Shihui Wei 2\*, Yonghua Hu 1\*

# Yiqun Wu and Mo Yang contributed equally.

\* Corresponding authors.

#### **Affiliation:**

1 Department of Epidemiology and Biostatistics, School of Public Health, Peking University Health Science Center, Beijing, China.

2 Department of Ophthalmology, The First Medical Center, Chinese PLA General Hospital, Beijing, China.

3 Department of Neuro-ophthalmology, Eye Hospital, China Academy of Chinese Medical Sciences, Beijing, China

**Supplementary Table 1 The age and sex-specific incidence of NMOSD in China, 2016-2017**

|          | N     | Incidence<br>(95% CI, per 100,000<br>person-years) | Female |                                                    | Male |                                                    | Female-to-male IRR <sup>†</sup><br>(95% CI) |
|----------|-------|----------------------------------------------------|--------|----------------------------------------------------|------|----------------------------------------------------|---------------------------------------------|
|          |       |                                                    | N      | Incidence<br>(95% CI, per 100,000<br>person-years) | N    | Incidence<br>(95% CI, per 100,000<br>person-years) |                                             |
| Overall  | 1,313 | 0.41 (0.39, 0.43)                                  | 1,031  | 0.68 (0.63, 0.72)                                  | 282  | 0.15 (0.13, 0.17)                                  | 4.52 (4.39, 4.65)                           |
| Age      |       |                                                    |        |                                                    |      |                                                    |                                             |
| 18-34    | 260   | 0.21 (0.19, 0.24)                                  | 207    | 0.35 (0.31, 0.40)                                  | 53   | 0.08 (0.06, 0.10)                                  | 4.68 (4.38, 4.99)                           |
| 35-44    | 288   | 0.39 (0.35, 0.44)                                  | 235    | 0.66 (0.58, 0.76)                                  | 53   | 0.13 (0.10, 0.17)                                  | 5.05 (4.75, 5.35)                           |
| 45-54    | 373   | 0.56 (0.50, 0.62)                                  | 302    | 0.95 (0.85, 1.07)                                  | 71   | 0.18 (0.14, 0.23)                                  | 5.24 (4.98, 5.49)                           |
| 55-64    | 234   | 0.67 (0.58, 0.76)                                  | 179    | 1.09 (0.93, 1.26)                                  | 55   | 0.26 (0.19, 0.33)                                  | 4.26 (3.96, 4.56)                           |
| 65-74    | 114   | 0.61 (0.50, 0.73)                                  | 79     | 0.94 (0.74, 1.17)                                  | 35   | 0.28 (0.20, 0.39)                                  | 3.34 (2.94, 3.74)                           |
| 75+      | 44    | 0.37 (0.26, 0.50)                                  | 29     | 0.52 (0.35, 0.75)                                  | 15   | 0.17 (0.10, 0.29)                                  | 3.02 (2.40, 3.64)                           |
| Han race | 1,133 | 0.4 (0.38, 0.42)                                   | 889    | 0.66 (0.62, 0.70)                                  | 244  | 0.15 (0.13, 0.17)                                  | 4.51 (4.36, 4.65)                           |

## Age

|       |     |                   |     |                   |    |                   |                   |
|-------|-----|-------------------|-----|-------------------|----|-------------------|-------------------|
| 18-34 | 206 | 0.20 (0.17, 0.23) | 167 | 0.34 (0.29, 0.39) | 39 | 0.07 (0.05, 0.09) | 5.20 (4.85, 5.55) |
| 35-44 | 246 | 0.39 (0.34, 0.44) | 200 | 0.65 (0.56, 0.75) | 46 | 0.13 (0.10, 0.17) | 4.99 (4.67, 5.31) |
| 45-54 | 330 | 0.55 (0.50, 0.62) | 266 | 0.94 (0.83, 1.06) | 64 | 0.18 (0.14, 0.24) | 5.09 (4.81, 5.36) |
| 55-64 | 206 | 0.64 (0.56, 0.74) | 158 | 1.05 (0.89, 1.23) | 48 | 0.25 (0.18, 0.33) | 4.25 (3.92, 4.57) |
| 65-74 | 103 | 0.60 (0.49, 0.73) | 70  | 0.91 (0.71, 1.14) | 33 | 0.29 (0.20, 0.41) | 3.08 (2.66, 3.49) |
| 75+   | 42  | 0.38 (0.27, 0.52) | 28  | 0.54 (0.36, 0.79) | 14 | 0.18 (0.10, 0.30) | 3.05 (2.41, 3.69) |

---

† IRR: incidence rate ratio.

**Supplementary Table 2 Incidence of NMOSD in areas with different latitude**

|                 | N     | Incidence<br>(95% CI, per 100,000<br>person-years) | Female |                                                    | Male |                                                    | Female-to-male IRR <sup>†</sup><br>(95% CI) |
|-----------------|-------|----------------------------------------------------|--------|----------------------------------------------------|------|----------------------------------------------------|---------------------------------------------|
|                 |       |                                                    | N      | Incidence<br>(95% CI, per 100,000<br>person-years) | N    | Incidence<br>(95% CI, per 100,000<br>person-years) |                                             |
| Overall         | 1,313 | 0.41 (0.39, 0.43)                                  | 1,031  | 0.68 (0.63, 0.72)                                  | 282  | 0.15 (0.13, 0.17)                                  | 4.52 (4.39, 4.65)                           |
| <b>Latitude</b> |       |                                                    |        |                                                    |      |                                                    |                                             |
| 20-             | 280   | 0.53 (0.46, 0.61)                                  | 225    | 0.93 (0.79, 1.08)                                  | 55   | 0.15 (0.11, 0.20)                                  | 6.31 (5.98, 6.64)                           |
| 25-             | 107   | 0.41 (0.33, 0.50)                                  | 89     | 0.71 (0.57, 0.88)                                  | 18   | 0.11 (0.07, 0.18)                                  | 6.29 (5.77, 6.81)                           |
| 30-             | 536   | 0.40 (0.36, 0.43)                                  | 402    | 0.62 (0.56, 0.69)                                  | 134  | 0.18 (0.15, 0.21)                                  | 3.51 (3.31, 3.71)                           |
| 35-             | 213   | 0.54 (0.46, 0.62)                                  | 162    | 0.89 (0.75, 1.04)                                  | 51   | 0.20 (0.15, 0.26)                                  | 4.48 (4.16, 4.81)                           |
| 40-             | 177   | 0.30 (0.26, 0.35)                                  | 153    | 0.54 (0.45, 0.64)                                  | 24   | 0.07 (0.05, 0.11)                                  | 7.32 (6.87, 7.77)                           |
| <i>P</i> -trend |       | 0.874                                              |        | 0.825                                              |      | 0.953                                              |                                             |
| Han race        | 1,133 | 0.40 (0.38, 0.42)                                  | 889    | 0.66 (0.62, 0.70)                                  | 244  | 0.15 (0.13, 0.17)                                  | 4.51 (4.36, 4.65)                           |

## Latitude

|                 |     |                   |     |                   |     |                   |                   |
|-----------------|-----|-------------------|-----|-------------------|-----|-------------------|-------------------|
| 20-             | 207 | 0.51 (0.43, 0.60) | 172 | 0.91 (0.76, 1.08) | 35  | 0.12 (0.08, 0.17) | 7.67 (7.26, 8.07) |
| 25-             | 96  | 0.41 (0.33, 0.50) | 79  | 0.70 (0.55, 0.87) | 17  | 0.12 (0.07, 0.19) | 5.86 (5.33, 6.40) |
| 30-             | 486 | 0.39 (0.36, 0.43) | 365 | 0.62 (0.55, 0.68) | 121 | 0.17 (0.14, 0.21) | 3.54 (3.34, 3.75) |
| 35-             | 185 | 0.54 (0.46, 0.63) | 137 | 0.88 (0.73, 1.05) | 48  | 0.22 (0.16, 0.29) | 4.04 (3.70, 4.37) |
| 40-             | 159 | 0.31 (0.26, 0.36) | 136 | 0.54 (0.45, 0.65) | 23  | 0.08 (0.05, 0.12) | 6.93 (6.47, 7.40) |
| <i>P</i> -trend |     | 0.897             |     | 0.836             |     | 0.987             |                   |

---

† IRR: incidence rate ratio.

**Supplementary Table 3 The comparison of basic characteristics between included and excluded provinces**

| Characteristic        | Included provinces (n=20) | Excluded provinces (n=11) |
|-----------------------|---------------------------|---------------------------|
| Age, n (million, %)   |                           |                           |
| 18-44                 | 464.0 (57.4)              | 144.37 (59.2)             |
| 45-64                 | 249.7 (30.9)              | 74.6 (30.6)               |
| ≥65                   | 94.1 (11.6)               | 24.8 (10.2)               |
| Sex, n (million, %)   |                           |                           |
| Male                  | 407.6 (50.5)              | 123.8 (50.8)              |
| Female                | 400.3 (49.5)              | 120.0 (49.2)              |
| GDP, billion RMB Yuan |                           |                           |
| Mean (SD)             | 2893.4 (1100.8)           | 1830.8 (1015.6)           |

Note: 2010 national census data and 2016 GDP data in China was used.

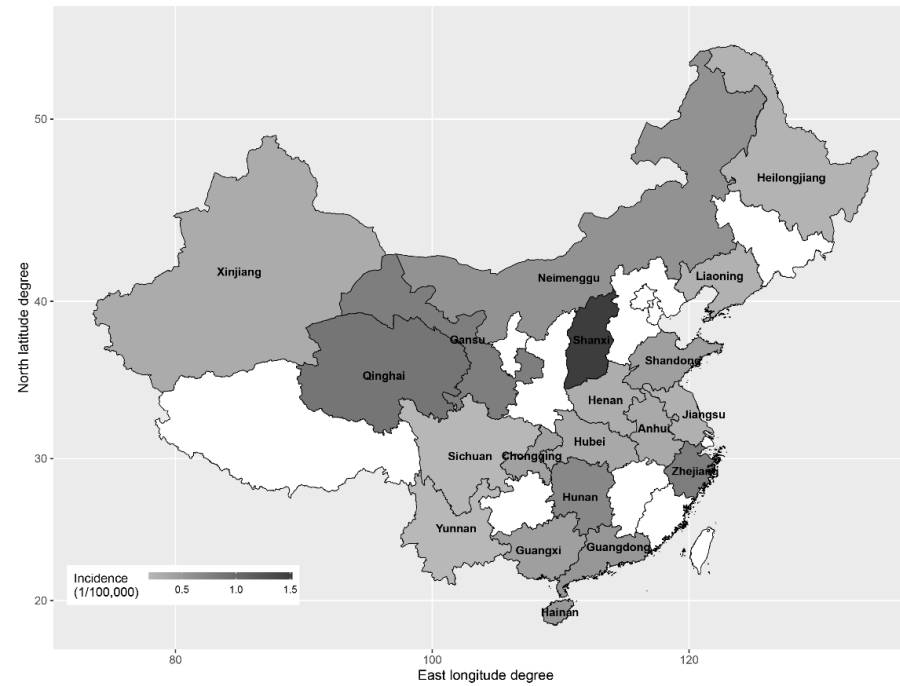

### Supplementary Figure 1 Incidence rates of NMOSD in 20 provinces in China (only keeping Han people)

The geospatial vector data was downloaded from <http://www.diva-gis.org/gdata>. The shapefiles were read using the “mapproj” package first,

then the map was drawn using the “ggplot2” package in R (version 3.6.0).

NMOSD incidence rate  
(1/100,000)

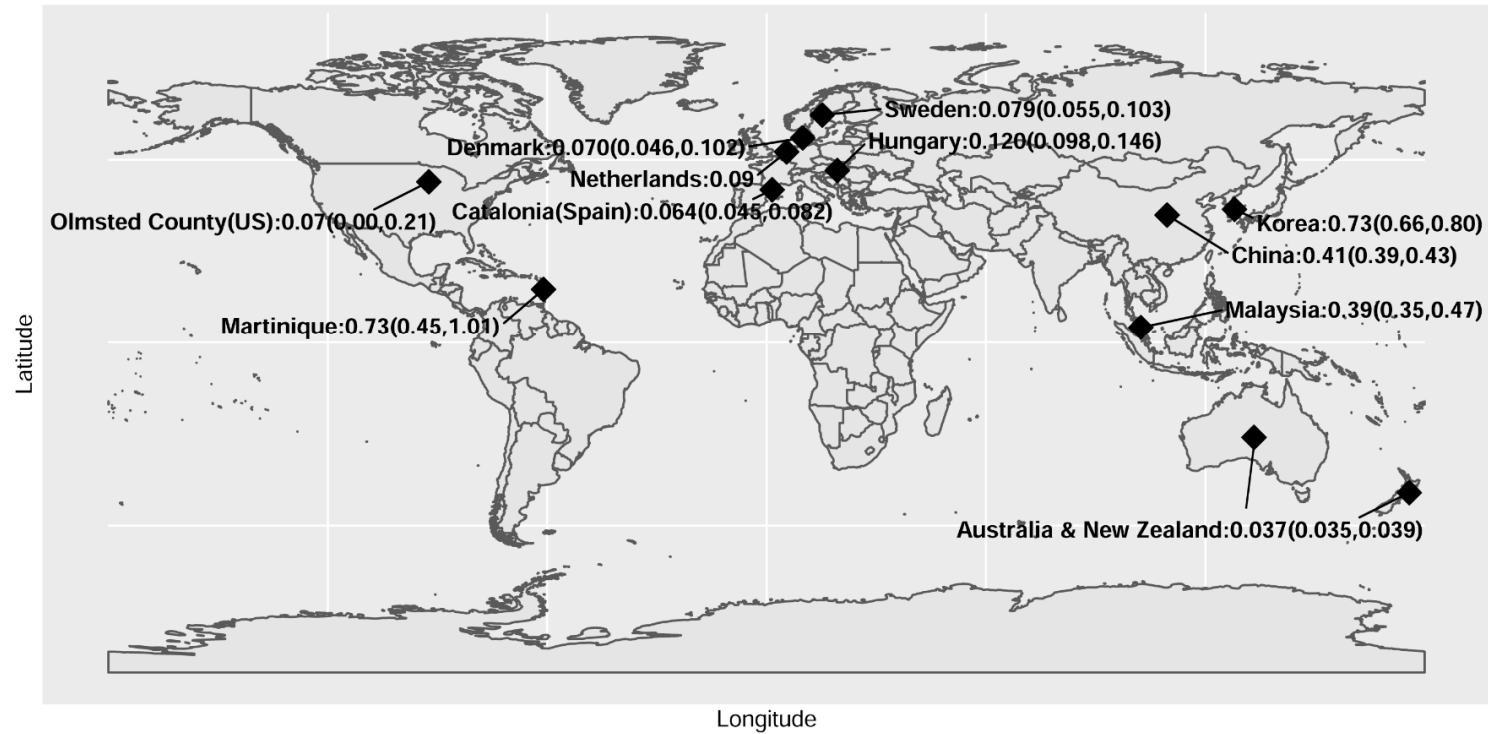

Supplementary Figure 2 Incidence rates of NMOSD in different countries
